# Supplementary material for: KASL clinical practice guidelines for noninvasive tests to assess liver fibrosis in chronic liver disease
Source: PubMed Central journal article supplement — Clin Mol Hepatol. 2024 Aug 19;30(Suppl):S5–S105. doi: 10.3350/cmh.2024.0506 (PMC11493350; doi:10.3350/cmh.2024.0506), 2024-08-19
Supplement: cmh-2024-0506-Supplementary-Table-1.pdf [file cmh-2024-0506-Supplementary-Table-1.pdf]

**Supplementary Table 1.** Committee members of KASL Clinical Practice Guidelines for Noninvasive Tests to Assess Liver Fibrosis in Chronic Liver Disease

|        | <b>Name</b>    | <b>Institution/Department</b>                                              | <b>Role/Part</b>                                                                      |
|--------|----------------|----------------------------------------------------------------------------|---------------------------------------------------------------------------------------|
| Chair  | Seung Up Kim   | Yonsei University College of Medicine, Internal Medicine                   | Guide the whole process                                                               |
| Deputy | Mi Na Kim      | Yonsei University College of Medicine, Internal Medicine                   | Organize the whole process                                                            |
| Member | Beom Kyung Kim | Yonsei University College of Medicine, Internal Medicine                   | TYPES OF NONINVASIVE TESTS                                                            |
|        | Moon Young Kim | Yonsei University Wonju College of Medicine, Internal Medicine             | SCREENING HIGH-RISK GROUPS                                                            |
|        | Sang Gyune Kim | Soonchunhyang University College of Medicine, Internal Medicine            | Advise for the whole process                                                          |
|        | Seung-seob Kim | Yonsei University College of Medicine, Radiology                           | TYPES OF NONINVASIVE TESTS                                                            |
|        | Won Kim        | Seoul National University College of Medicine, Internal Medicine           | Advise for the whole process                                                          |
|        | Hee Yeon Kim   | The Catholic University of Korea, Internal Medicine                        | DIAGNOSTIC PERFORMANCE OF NONINVASIVE TESTS FOR LIVER FIBROSIS, and systematic review |
|        | Yu Rim Shin    | Yonsei University College of Medicine, Thoracic and Cardiovascular Surgery | DIAGNOSTIC PERFORMANCE OF NONINVASIVE TESTS FOR LIVER FIBROSIS                        |
|        | Jihyun An      | Hanyang University College of Medicine, Internal Medicine                  | DIAGNOSTIC PERFORMANCE OF NONINVASIVE TESTS FOR LIVER FIBROSIS, and systematic review |
|        | Jung Hwan Yu   | Inha University School of Medicine, Internal Medicine                      | SCREENING HIGH-RISK GROUPS, and systematic review                                     |
|        | Minjong Lee    | Ewha Womans University College of Medicine, Internal Medicine              | DIAGNOSTIC PERFORMANCE OF NONINVASIVE TESTS FOR LIVER FIBROSIS                        |
|        | Eun Joo Lee    | Yonsei University College of Medicine, Pediatrics                          | PEDIATRIC PATIENTS                                                                    |
|        | Han Ah Lee     | Chung-Ang University College of Medicine, Internal Medicine                | DIAGNOSTIC PERFORMANCE OF NONINVASIVE TESTS FOR LIVER FIBROSIS, and systematic review |
|        | Dae Won Jun    | Hanyang University College of Medicine, Internal Medicine                  | Guide the whole process of systematic review                                          |
|        | Young Eun Chon | CHA University, Internal Medicine                                          | SCREENING HIGH-RISK GROUPS, and systematic review                                     |
|        | Yuri Cho       | National Cancer Center, Internal Medicine                                  | DIAGNOSTIC PERFORMANCE OF NONINVASIVE TESTS FOR LIVER FIBROSIS                        |
|        | Eun Ju Cho     | Seoul National University College of Medicine, Internal Medicine           | SCREENING HIGH-RISK GROUPS                                                            |
|        | Young-Joo Jin  | Inha University School of Medicine, Internal Medicine                      | TYPES OF NONINVASIVE TESTS, and systematic review                                     |
|        | YoungRok Choi  | Seoul National University College of Medicine, Surgery                     | SCREENING HIGH-RISK GROUPS                                                            |
|        | Ji Won Han     | The Catholic University of Korea, Internal Medicine                        | SCREENING HIGH-RISK GROUPS, and systematic review                                     |

**Supplementary Table 1.** Continued

Delphi Committee

| <b>Name</b>     | <b>Institution</b>                                                  |
|-----------------|---------------------------------------------------------------------|
| Oh Sang Kwon    | Gachon University College of Medicine, Internal Medicine            |
| In Hee Kim      | Jeonbuk National University Medical School,, Internal Medicine      |
| Ji Hoon Kim     | Korea University College of Medicine, Internal Medicine             |
| Soo Young Park  | Kyungpook National University School of Medicine, Internal Medicine |
| Byung Kuk Jang  | Keimyung University College of Medicine, Internal Medicine          |
| Jae Youn Cheong | Ajou University School of Medicine, Internal Medicine               |
| Byung Seok Lee  | Chungnam National University School of Medicine, Internal Medicine  |
| Jung Il Lee     | Yonsei University College of Medicine, Internal Medicine            |
| Tae Hee Lee     | Konyang University College of Medicine, Internal Medicine           |
| Hyung Joon Yim  | Korea University College of Medicine, Internal Medicine             |
| Yong Kyun Cho   | Sungkyunkwan University School of Medicine, Internal Medicine       |

Advisory Committee

| <b>Name</b>    | <b>Institution</b>                                                  |
|----------------|---------------------------------------------------------------------|
| Young Seok Kim | Soonchunhyang University College of Medicine, Internal Medicine     |
| Jin Wook Kim   | Seoul National University College of Medicine, Internal Medicine    |
| Jong Eun Yeon  | Korea University College of Medicine, Internal Medicine             |
| Young Suk Lim  | University of Ulsan College of Medicine, Internal Medicine          |
| Won Young Tak  | Kyungpook National University School of Medicine, Internal Medicine |
| Moon Seok Choi | Sungkyunkwan University School of Medicine, Internal Medicine       |
