# Supplementary material for: KASL clinical practice guidelines for noninvasive tests to assess liver fibrosis in chronic liver disease
Source: PubMed Central journal article supplement — Clin Mol Hepatol. 2024 Aug 19;30(Suppl):S5–S105. doi: 10.3350/cmh.2024.0506 (PMC11493350; doi:10.3350/cmh.2024.0506), 2024-08-19
Supplement: cmh-2024-0506-Supplementary-Table-2.pdf [file cmh-2024-0506-Supplementary-Table-2.pdf]

**Supplementary Table 2.** Disclosure of conflict of interest

All committee members who participated in the development of the guidelines prepared a declaration of interests consisting of the following questions, and information on conflicts of interest within the last three years was as follows.

1. Do you have intellectual property rights such as patents, trademarks, licensing, and royalties in relation to interventions (drugs, medical technologies, etc.) covered by the clinical practice guidelines?
2. Are you employed (if you have an official/informal title) or have you ever been employed by a company or organization that is commercially related to the interventions covered by the clinical practice guidelines (drugs, medical technology, etc.)?
3. Do you have unlisted shares (stock options, non-trading stocks) or listed shares (over 10 million won, including stock options, but excluding indirect investment through mutual funds, etc.) of a company or organization that is commercially related to clinical practice guidelines?
4. Have you ever received research funds, grants, or equipment support from a company or organization that is commercially related to clinical practice guidelines?
5. Have you ever received honoraria, consulting fees, or payments (travel expenses, etc.) exceeding KRW 3 million each year or a total of KRW 10 million or more from companies or organizations that are commercially related to clinical practice guidelines?
6. Do you have any of the relationships described above in your family (parents, spouse, children) or the company in which a family member is involved?

| Name                  | Details                                                                                                                                                                                                                                                                                                                                                                                                                                                                                                            |
|-----------------------|--------------------------------------------------------------------------------------------------------------------------------------------------------------------------------------------------------------------------------------------------------------------------------------------------------------------------------------------------------------------------------------------------------------------------------------------------------------------------------------------------------------------|
| Development Committee |                                                                                                                                                                                                                                                                                                                                                                                                                                                                                                                    |
| Seung Up Kim          | Participation in research sponsored by Abbvie, Gilead, BMS, EchoSens<br>Medical consultation/lecture fee for BMS, Abbvie, Gilead, Bayer, Eisai, Sirtex, Boston Scientific, Novo Nordisc, Samil, Ildong, Hanmi, Yuhan, Daewoong, Samjin, Chong Kun Dang, Inoen, Pharmaking, GC Wellbeing, GC cell, Acme medical                                                                                                                                                                                                     |
| Mi Na Kim             | Nothing to disclose                                                                                                                                                                                                                                                                                                                                                                                                                                                                                                |
| Beom Kyung Kim        | Nothing to disclose                                                                                                                                                                                                                                                                                                                                                                                                                                                                                                |
| Moon Young Kim        | Nothing to disclose                                                                                                                                                                                                                                                                                                                                                                                                                                                                                                |
| Sang Gyune Kim        | Nothing to disclose                                                                                                                                                                                                                                                                                                                                                                                                                                                                                                |
| Seung-seob Kim        | Nothing to disclose                                                                                                                                                                                                                                                                                                                                                                                                                                                                                                |
| Won Kim               | Honoraria/Advisory role: Gilead, Boehringer-Ingelheim, GSK, Novo Nordisk, Samil, Ildong, LG Chemistry, YUHAN, Hanmi, HK Inoen, Standigm, PharmaKing, KOBIO LABS, Olix Pharma, TSD Life Sciences, Daewoong, QUEST, Therasid Bioscience, Korea United Pharm, and Eisai<br>Research funding: GSK, Gilead, Novartis, Pfizer, Roche, Springbank, Altimmune, Ildong, DaeWoong, Dicerna, Celgene, Hanmi, Novo Nordisk, Galmed, Enyo, and KOBIO LABS<br>Stock: KOBIO LABS and Lepidyne<br>Founder: Remedygen Incorporation |
| Hee Yeon Kim          | Nothing to disclose                                                                                                                                                                                                                                                                                                                                                                                                                                                                                                |
| Yu Rim Shin           | Nothing to disclose                                                                                                                                                                                                                                                                                                                                                                                                                                                                                                |
| Jihyun An             | Nothing to disclose                                                                                                                                                                                                                                                                                                                                                                                                                                                                                                |
| Jung Hwan Yu          | Nothing to disclose                                                                                                                                                                                                                                                                                                                                                                                                                                                                                                |
| Minjong Lee           | Nothing to disclose                                                                                                                                                                                                                                                                                                                                                                                                                                                                                                |
| Eun Joo Lee           | Nothing to disclose                                                                                                                                                                                                                                                                                                                                                                                                                                                                                                |
| Han Ah Lee            | Nothing to disclose                                                                                                                                                                                                                                                                                                                                                                                                                                                                                                |
| Dae Won Jun           | Nothing to disclose                                                                                                                                                                                                                                                                                                                                                                                                                                                                                                |
| Young Eun Chon        | Nothing to disclose                                                                                                                                                                                                                                                                                                                                                                                                                                                                                                |
| Yuri Cho              | Nothing to disclose                                                                                                                                                                                                                                                                                                                                                                                                                                                                                                |
| Eun Ju Cho            | Nothing to disclose                                                                                                                                                                                                                                                                                                                                                                                                                                                                                                |
| Young-Joo Jin         | Nothing to disclose                                                                                                                                                                                                                                                                                                                                                                                                                                                                                                |
| YoungRok Choi         | Nothing to disclose                                                                                                                                                                                                                                                                                                                                                                                                                                                                                                |
| Ji Won Han            | Participation in research sponsored by Daewoong, Gilead, and LG Chem                                                                                                                                                                                                                                                                                                                                                                                                                                               |

**Supplementary Table 2.** Continued

| Name               | Details             |
|--------------------|---------------------|
| Delphi Committee   |                     |
| Oh Sang Kwon       | Nothing to disclose |
| In Hee Kim         | Nothing to disclose |
| Ji Hoon Kim        | Nothing to disclose |
| Soo Young Park     | Nothing to disclose |
| Byung Kuk Jang     | Nothing to disclose |
| Jae Youn Cheong    | Nothing to disclose |
| Byung Seok Lee     | Nothing to disclose |
| Jung Il Lee        | Nothing to disclose |
| Tae Hee Lee        | Nothing to disclose |
| Hyung Joon Yim     | Nothing to disclose |
| Yong Kyun Cho      | Nothing to disclose |
| Advisory Committee |                     |
| Young Seok Kim     | Nothing to disclose |
| Jin Wook Kim       | Nothing to disclose |
| Jong Eun Yeon      | Nothing to disclose |
| Young Suk Lim      | Nothing to disclose |
| Won Young Tak      | Nothing to disclose |
| Moon Seok Choi     | Nothing to disclose |
